# Supplementary material for: Implementation and adherence of routine pertussis vaccination (DTP) in a low-resource urban birth cohort
Source: HighWire-hosted journal article supplement (doi:10.1136/bmjopen-2020-041198), 2020-12-01
Supplement: bmjopen-2020-041198supp001_data_supplement.pdf [file bmjopen-2020-041198supp001_data_supplement.pdf]

## Implementation and adherence of routine pertussis vaccination (DTP) in a low-resource urban birth cohort

Gunning et al.

November 13, 2020

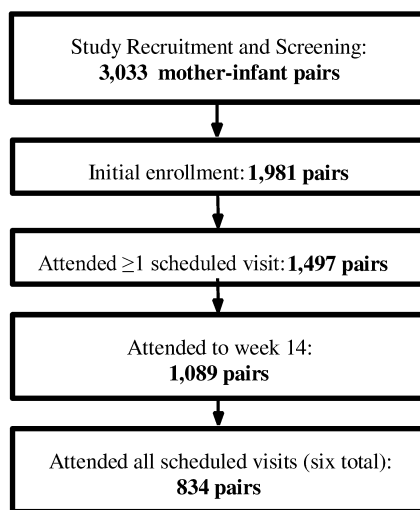

Figure S1: Study profile of birth cohort enrollment and attendance. Beyond eligibility and initial screening, the sole cause of cohort attrition was failure to attend one or more scheduled clinic visits.
